# Supplementary material for: Quaternized poly (ether ether ketone)s doped with phosphoric acid for high-temperature polymer electrolyte membrane fuel cells
Source: Royal Society of Chemistry journal article supplement (doi:10.1039/c4ta01931h), 2014-01-01
Supplement: c4ta01931h1.pdf [file c4ta01931h1.pdf]

## Quaternized poly (ether ether ketone)s doped with phosphoric acid for high temperature polymer electrolyte membrane fuel cells

Na Zhang, Baolong Wang, Chengji Zhao\*, Shuang Wang, Yurong Zhang, Fanzhe Bu, Ying Cui, Xuefeng Li and Hui Na\*

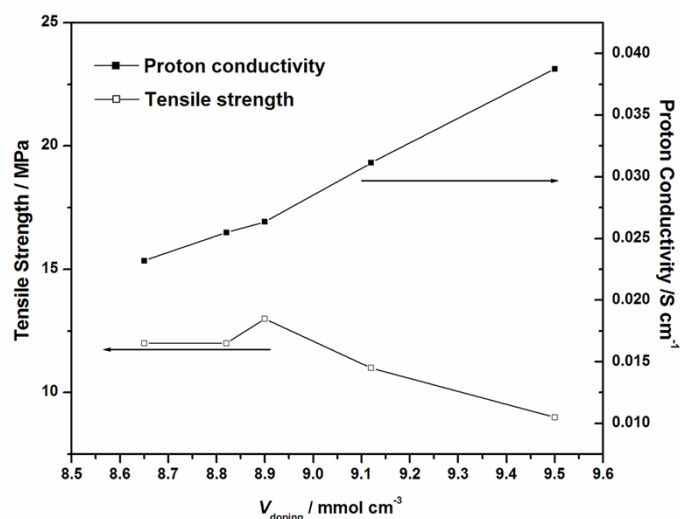

Figure S1 The tensile strength (298 K) and proton conductivity (433 K) at different  $V_{\text{doping}}$ .

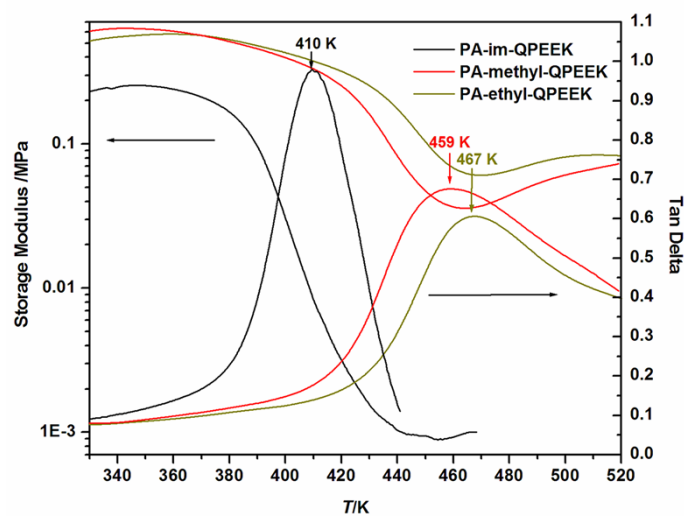

Figure S2. The DMA curves of PA doped membranes.

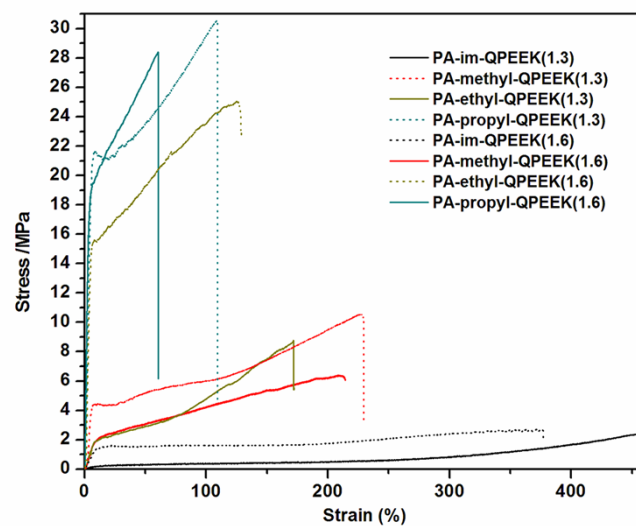

Figure S3. The mechanical properties of PA doped membranes at 403 K.
